# Supplementary material
Source: publisher figshare collection journal article supplement (https://plos.figshare.com/articles/dataset/_/9590063)
Supplement: Supplementary file 1 [file 1]

Archive with 8 entries (8 files):
- pmed.1002870.s001.pdf
- pmed.1002870.s002.pdf
- pmed.1002870.s003.pdf
- pmed.1002870.s004.pdf
- pmed.1002870.s005.pdf
- pmed.1002870.s006.pdf
- pmed.1002870.s007.xls
- pmed.1002870.s008.pdf
