# Supplementary material
Source: publisher figshare collection journal article supplement (https://plos.figshare.com/articles/dataset/_/9590063)
Supplement: Supplementary file 1 [file 1 › pmed.1002870.s004.pdf]

**S1 Table:** Multivariable regression results showing percentage difference in geometric mean plasma homocysteine between trial arms, restricted to fasted, non-pregnant, compliant participants

| Trial arms               | Timepoint | N*  | $\beta$ (95% CI)**   | % difference in geometric means † | P value |
|--------------------------|-----------|-----|----------------------|-----------------------------------|---------|
| Drink powder vs. control | 12 weeks  | 141 | -0.28 (-0.36, -0.19) | -24.1 (-30.1, -17.4)              | <0.001  |
| UNIMMAP vs. control      | 12 weeks  | 143 | -0.18 (-0.25, -0.1)  | -16.4 (-22.5, -9.9)               | <0.001  |
| Drink powder vs. UNIMMAP | 12 weeks  | 130 | -0.10 (-0.18, -0.01) | -9.2 (-16.7, -1.1)                | 0.028   |
| Drink powder vs. control | 5 weeks   | 176 | -0.44 (-0.52, -0.37) | -35.8 (-40.4, -30.8)              | <0.001  |
| UNIMMAP vs. control      | 5 weeks   | 168 | -0.26 (-0.33, -0.18) | -22.5 (-27.9, -16.8)              | <0.001  |
| Drink powder vs. UNIMMAP | 5 weeks   | 162 | -0.17 (-0.25, -0.1)  | -15.9 (-21.9, -9.4)               | <0.001  |

\*  $\beta$  represents difference in log homocysteine at time point between trial arms, adjusted for baseline homocysteine, age and body mass index at time point.

\*\*Fasted and non-pregnant at time point, and above 80% compliance at time point

† Calculated from  $(e^{\beta}-1)*100$
