# Supplementary material
Source: publisher figshare collection journal article supplement (https://plos.figshare.com/articles/dataset/_/9590063)
Supplement: Supplementary file 1 [file 1 › pmed.1002870.s005.pdf]

**S2 Table:** Unadjusted blood pressure and pulse results by timepoint and trial arm

|                                        | <b>Baseline</b> |                            | <b>Midline</b> |                            | <b>Endline</b> |                            |
|----------------------------------------|-----------------|----------------------------|----------------|----------------------------|----------------|----------------------------|
|                                        | N               | Geometric mean<br>(95% CI) | N              | Geometric mean<br>(95% CI) | N              | Geometric mean<br>(95% CI) |
| <b>Systolic Blood Pressure (mmHg)</b>  |                 |                            |                |                            |                |                            |
| Control                                | 100             | 114.4<br>(111.6, 117.2)    | 93             | 107.1<br>(104.7, 109.5)    | 82             | 106.5<br>(104.0, 109.1)    |
| UNIMMAP                                | 93              | 115.0<br>(112.3, 117.8)    | 88             | 107.9<br>(105.6, 110.2)    | 77             | 105.2<br>(103.0, 107.4)    |
| Drink powder                           | 104             | 113.6<br>(111.1, 116.1)    | 92             | 108.7<br>(106.5, 111.0)    | 84             | 106.9<br>(104.7, 109.2)    |
| <b>Diastolic Blood Pressure (mmHg)</b> |                 |                            |                |                            |                |                            |
| Control                                | 100             | 70.1<br>(68.3, 72.0)       | 93             | 68.4<br>(66.9, 69.9)       | 82             | 68.3<br>(66.6, 70.0)       |
| UNIMMAP                                | 93              | 71.0<br>(68.9, 73.1)       | 88             | 68.1<br>(66.5, 69.7)       | 77             | 67.9<br>(66.3, 69.6)       |
| Drink powder                           | 104             | 68.7<br>(66.8, 70.5)       | 92             | 67.5<br>(65.8, 69.3)       | 84             | 67.6<br>(66.0, 69.3)       |
| <b>Pulse (beats per minute)</b>        |                 |                            |                |                            |                |                            |
| Control                                | 100             | 72.3<br>(70.2, 74.5)       | 93             | 75.4<br>(73.1, 77.7)       | 82             | 77.3<br>(75.0, 79.8)       |
| UNIMMAP                                | 93              | 72.2<br>(69.5, 74.9)       | 88             | 74.5<br>(71.9, 77.1)       | 77             | 74.9<br>(72.6, 77.4)       |
| Drink powder                           | 104             | 72.0<br>(69.9, 74.1)       | 92             | 73.9<br>(71.9, 75.8)       | 84             | 76.7<br>(74.2, 79.3)       |

Abbreviations: CI, confidence interval; UNIMMAP, Daily United Nations Multiple Micronutrient Preparation supplement.
