# Supplementary material
Source: publisher figshare collection journal article supplement (https://plos.figshare.com/articles/dataset/_/9590063)
Supplement: Supplementary file 1 [file 1 › pmed.1002870.s006.pdf]

**S3 Table: Additional details on morbidity**

| Adverse Event        | UNIMMAP |                |                  |               |               | Drink Powder |                |                  |               |               |
|----------------------|---------|----------------|------------------|---------------|---------------|--------------|----------------|------------------|---------------|---------------|
|                      | N       | Mean<br>(days) | Median<br>(days) | Min<br>(days) | Max<br>(days) | N            | Mean<br>(days) | Median<br>(days) | Min<br>(days) | Max<br>(days) |
| Nausea               | 104     | 0.26           | 0                | 0             | 5             | 93           | 0.21           | 0                | 0             | 7             |
| Dizziness            | 104     | 0.37           | 0                | 0             | 10            | 93           | 0.30           | 0                | 0             | 6             |
| Urine discolouration | 104     | 0.05           | 0                | 0             | 2             | 93           | 0.37           | 0                | 0             | 8             |
| Abdominal pain       | 104     | 0.58           | 0                | 0             | 19            | 93           | 0.46           | 0                | 0             | 14            |
| Fever                | 104     | 0.07           | 0                | 0             | 2             | 93           | 0.18           | 0                | 0             | 7             |
