# Supplementary material
Source: publisher figshare collection journal article supplement (https://plos.figshare.com/articles/dataset/_/9590063)
Supplement: Supplementary file 1 [file 1 › pmed.1002870.s007.xls]

## Sheet: Sheet1
Study ID	Baseline study date	Intervention	Fasted at baseline? (No=0, Yes=1)	Homocysteine baseline (umol/L)	Systolic BP baseline	Diastolic BP baseline	Pulse Baseline	BMI Baseline	Age at baseline (years)	Pregnant at midline? (No=0, Yes=1)	Fasted at midline? (No=0, Yes=1)	Homocysteine midline (umol/L)	Systolic BP midline	Diastolic BP midline	Pulse midline	BMI midline	Fasted at endline? (No=0, Yes=1)	Pregnant at endline? (No=0, Yes=1)	Homocysteine endline (umol/L)	Systolic BP endline	Diastolic BP endline	Pulse endline	BMI endline	Compliance (% of supplements consumed)	diarrhoea_total (days reported)	nausea_total (days reported)	dizzy_total (days reported)	urine_discoloration (days reported)	skin_odour_total (days reported)	Abdominal pain_total (days reported)	weight_loss_total (days reported)	hair_loss_total (days reported)	Feeling irritable (days reported)	hives_total (days reported)	fever_total (days reported)
1	2018-03-29	UNIMMAP	1	11.6	121.667	67	76.6667	20.2283	37.0623	0	1	11.43	115.333	69.3333	77	20.3335	1	0	13.23	110.333	61.3333	78.6667	19.6154	100	0	0	0	0	0	1	0	0	0	0	0
2	2018-04-04	UNIMMAP	1	8.31	114.333	73.6667	74.3333	23.5603	26.757	0	1	6.49	115.667	77	78.3333	22.2435								95.1807	0	3	0	0	2	19	0	0	0	0	0
3	2018-04-04	UNIMMAP	1	9.24	126.667	74.3333	69.3333	21.9311	19.7481	0	1	8.86	110.333	60.6667	74	21.7128	0	0	11.01	109.333	63	84.3333	20.883	97.5904	0	0	0	0	0	0	0	0	0	0	0
4	2018-03-26	UNIMMAP	1	11.15	95	64.6667	72	21.4687	33.8234	0	1	10.35	101.667	65	68	21.2973	1	1	5.91	98.3333	62.3333	79.6667	21.0122	96.3855	0	0	0	0	0	0	0	0	0	0	0
5	2018-04-03	UNIMMAP	1	10.6	116.333	61.3333	56.3333	20.5647	24.9199	1	1	7.96	103.667	60.6667	78.6667	21.2024	0	1	8.84	107.667	60.3333	94.6667	19.6815	91.5663	0	0	0	0	0	0	0	0	0	0	0
6	2018-04-05	UNIMMAP	1	11.5	128.667	89.6667	76	30.3725	40.7584	0	1	8.26	113.667	85	84.6667	30.4236	1	0	9.9	126	88.3333	91	29.8406	100	0	0	0	0	0	0	0	0	0	0	0
7	2018-04-05	UNIMMAP	1	10.37	123.333	80	97.6667	18.4224	21.0787	0	1	7.82	108.667	70.6667	81	17.3767	1	0	9.27	121.333	74.6667	100	18.0883	97.5904	0	0	0	0	0	0	0	0	0	0	0
8	2018-04-03	UNIMMAP	1	11.02	100.333	53.3333	56	18.4454	18.9049	0	1	9.66	102.667	50.6667	74	18.7279	1	0	9.55	97.6667	57	72	18.6638	97.5904	0	1	0	1	0	1	0	0	0	0	0
9	2018-04-04	UNIMMAP	1	12.48	98.3333	55.3333	71	22.4379	18.6201	0	1	8.72	103.667	56	65.3333	22.0813	1	0	10.26	93.6667	51.3333	69.3333	21.9534	95.1807	0	2	2	0	0	1	0	0	0	0	0
10	2018-03-30	UNIMMAP	1	4.25	88.3333	56	78	16.9135	23.7426	0	1	7	87.6667	60	82	16.4893	1	0	8.4	97.3333	62.3333	87	16.1463	100	0	0	0	0	0	0	0	0	0	0	2
11	2018-04-06	UNIMMAP	1	6.36	100	61	77.3333	15.4139	19.7262	0	1	4.37	96	59.6667	57	15.641	1	0	5.97	89.6667	58	83.3333	16.0523	98.7952	0	1	0	0	0	0	0	0	0	0	0
12	2018-03-26	UNIMMAP	1	24.66	111.333	74	69.3333	21.539	42.5818	0	1	11.44	103.333	71	64	22.0992	1	0	7.67	99	70	62.6667	22.2156	97.5904	0	2	0	0	0	0	0	0	0	0	0
13	2018-03-29	UNIMMAP	1	8.67	110.333	72.3333	76.6667	19.2945	34.4668	0	1	10.64	107.333	70.3333	81.3333	19.4865	1	0	7.09	98.3333	66.6667	84.3333	18.8294	100	3	0	7	0	0	1	0	0	0	0	2
14	2018-03-30	UNIMMAP	1	6.52	99.3333	61.6667	72.3333	19.6786	43.039	0	1	6.69	103	70	67.3333	19.7607	1	0	7.08	99	64.3333	71.3333	19.4809	100	0	0	0	0	0	0	0	0	0	0	0
15	2018-03-29	UNIMMAP	1	9.1	111	63.3333	68	19.0822	25.5277	0	1	10.94	104.333	68	72.3333	19.2616	1	0	11.01	107.667	62.6667	79	18.6888	97.5904	0	0	2	0	0	0	0	0	0	0	0
16	2018-03-28	UNIMMAP	1	22.53	119	67.6667	49.6667	20.3707	39.7372	0	1		114	72.6667	49.6667	21.3445	1	0	12.72	105	70.6667	55.3333	20.9998	100	0	0	0	0	0	0	0	0	0	0	0
17	2018-04-04	UNIMMAP	1	16.03	173.333	105.667	88	20.2689	41.755	0	1	11.48	160.667	106.333	93	21.0405	1	0	13.8	139	95.6667	104.333	21.5706	79.5181	0	1	0	0	0	0	0	0	0	0	0
18	2018-03-27	UNIMMAP	1	11.15	120.333	65	57.3333	18.9203	18.4613	0	1	9.76	117.333	59.6667	56	18.6832	1	0	5.45	117	61.3333	58	18.627	86.747	0	0	0	0	0	0	0	0	0	0	0
19	2018-03-27	UNIMMAP	1	15.05	98.6667	61.3333	72.3333	18.5913	18.3546	0	1	14.3	107.333	63.6667	71.3333	19.0409	1	0	8.02	107.333	72.3333	77.3333	19.1895	91.5663	0	0	0	0	0	0	0	0	0	0	0
20	2018-04-06	UNIMMAP	1	10.38	127.333	79	67	23.0253	32.7611	0	1	7.59	120.333	76.6667	64.3333	23.1591	1	0	7.38	117.667	72	60	22.3734	100	0	0	3	0	0	0	0	0	0	0	0
21	2018-03-30	UNIMMAP	1	5.91	112.667	68.6667	59.3333	16.0353	39.2252															27.7108	0	0	4	0	0	0	2	0	0	0	2
22	2018-04-04	UNIMMAP	1	10.98	101.667	70.3333	67	34.8818	20.6242	0	1	10.1	99.3333	69.3333	72	34.8051	1	0	7.57	102.333	71.6667	79.3333	34.9038	84.3373	0	1	0	0	0	3	0	0	0	0	0
23	2018-04-03	UNIMMAP	1	8.85	104.667	58.3333	68.3333	17.8284	29.7522	0	1	10.36	107	64	76	17.2275	1	0	7.03	94	56	82	17.3867	100	0	0	0	0	0	0	0	0	0	0	0
24	2018-03-29	UNIMMAP	1	8.26	105.667	61.6667	68.6667	19.106	31.7755	0	1	8.82	104.667	64.3333	83.3333	19.4424	1	0	10.48	95.6667	60.6667	88	19.3327	100	0	0	1	0	0	0	0	0	0	0	0
25	2018-03-27	UNIMMAP	1	12.69	119.667	86	76	25.5286	43.7344	0	1	10.01	120.667	80.6667	81	26.2707	1	0	12.49	114.333	81.6667	67.6667	25.4393	91.5663	0	1	0	0	0	0	0	0	0	0	0
26	2018-03-26	UNIMMAP	1	14.84	108	69.3333	85.6667	30.2155	32.5749
27	2018-04-06	UNIMMAP	1	6.94	115.667	66.3333	81.3333	28.8886	26.2067	0	1	4.3	102.333	63	80.3333	29.6047	1	0	5.3	109.333	71.3333	87	29.2333	98.7952	0	0	0	0	0	0	0	0	0	0	0
28	2018-04-02	UNIMMAP	1	6.78	118.667	69.3333	69.3333	20.6288	25.9767								1	1	8.35	125	72	86	20.3888	100	0	0	1	0	1	1	0	0	0	0	0
29	2018-04-05	UNIMMAP	1	5.15	104.667	66.3333	85.6667	19.0599	26.7598	0	1	5.74	92.3333	63.3333	82.3333	19.4398	1	0	6.82	100.667	67.6667	89	18.24	97.5904	0	1	0	0	0	0	0	0	0	0	0
30	2018-03-28	UNIMMAP	1	9.27	97	58.6667	54.6667	23.9278	42.8309	0	1	8.61	103.333	65	61.6667	24.3765	1	0	7.67	105.333	70	62.6667	24.3746	100	0	0	0	0	0	0	0	0	0	0	0
31	2018-03-30	UNIMMAP	1	6.19	103.667	55.6667	65.3333	20.2618	19.7426	0	1	8.12	94.6667	52.3333	80	19.9172								100	0	0	0	0	0	0	0	0	0	0	0
32	2018-04-04	UNIMMAP	1	8.78	101.667	60.6667	84.3333	21.5424	21.4346	0	1	6.83	108.667	63.6667	81	20.8892	0	0	8.12	105.333	63.6667	89.3333	20.9547	98.7952	0	0	1	0	0	0	0	0	0	0	0
33	2018-03-28	UNIMMAP	1	10.2	126.333	72.3333	75.6667	18.4148	19.1622															4.81928	0	0	0	0	0	0	0	0	0	0	0
34	2018-03-27	UNIMMAP	1	12.23	109	63.3333	62.6667	20.2557	18.7406	0	1	11.17	109	65.3333	62.3333	19.5505	1	0	6.94	115	69.3333	68.3333	19.3003	91.5663	0	0	0	0	0	0	0	0	0	0	0
35	2018-04-05	UNIMMAP	1	10.41				25.5635	32.7584	0	1	7.39	131.333	75.6667	76.6667	25.7503	1	0	9.6	111.333	74	69.3333	24.7174	100	1	0	0	0	0	0	0	0	0	0	0
36	2018-03-27	UNIMMAP	1	6.47	96	58.3333	85.3333	17.533	18.3682	0	1	6.59	94.3333	60	83	17.5091	1	0	7.07	92	64.3333	84	17.7628	90.3614	0	0	0	0	0	0	0	0	0	0	0
37	2018-03-28	UNIMMAP	1	16.38	127.667	62	62.6667	16.5249	38.7379															12.0482	0	0	3	0	0	0	0	0	0	0	0
38	2018-04-06	UNIMMAP	1	6.64	104.333	69.6667	103	16.4372	19.6988	0	1	6.64	105	69.3333	80.3333	16.4693	1	0	6.88	99	60.6667	89.6667	16.1036	95.1807	0	0	0	0	0	0	0	0	0	0	0
39	2018-03-30	UNIMMAP	1	7.22	112	64	66.3333	22.9069	43.7426	0	1	8	104.667	66	67.6667	23.2962	1	0	8.22	106.333	65	62.3333	23.9324	86.747	0	0	0	0	0	0	0	0	0	0	0
40	2018-04-02	UNIMMAP	1	13.39	122	78.3333	64	23.1782	41.7495	0	1	14.5	112.333	67	64.6667	23.4749	1	0	10.39	93	63.6667	71.6667	22.7974	96.3855	0	0	0	0	0	0	0	0	0	0	0
41	2018-04-02	UNIMMAP	1	10.25	106.333	57	68	22.2866	21.0404	0	1	11.76	92	57.3333	76.6667	21.6877	1	0	10.94	100.333	59.3333	78.3333	21.8852	100	0	0	0	0	0	0	0	0	0	0	0
42	2018-03-27	UNIMMAP	1	11.19	121	85.6667	99.6667	17.7327	18.4011	0	1	4.9	112.333	80	82.6667	17.7165	1	0	10.34	112	75.6667	84.3333	16.4927	74.6988	0	0	0	0	0	0	0	0	0	0	0
43	2018-04-05	UNIMMAP	1	9.05	122.667	89.3333	90.3333	28.545	41.7577	0	0	8.15	110.667	78.3333	81.3333	28.1115								100	0	0	0	0	0	0	0	0	0	0	0
44	2018-03-26	UNIMMAP	1	13.46	103.333	66.3333	71.6667	19.7009	26.0233	0	1	8.06	107.667	59.3333	79.3333	19.2628	1	0	7.21	105.333	78.3333	87	19.3674	90.3614	0	1	0	2	0	0	0	0	0	0	0
45	2018-03-27	UNIMMAP	1	5.72	111.333	65.6667	75	17.4731	19.3347	1	1	7.37	108.333	59.3333	90.6667	17.4651								37.3494	0	1	0	0	0	0	0	0	0	0	0
46	2018-04-02	UNIMMAP	1	6.8	110.333	66.6667	81.3333	22.309	19.0992															0	0	0	0	0	0	0	0	0	0	0	0
47	2018-03-27	UNIMMAP	1	9.05	97.3333	62.6667	83	16.2365	20.5366	0	1	7.39	97.6667	63.6667	98.6667	15.3661	1	1	6.88	90	62	83.6667	15.1658	91.5663	0	1	0	0	0	0	0	0	0	0	0
48	2018-03-26	UNIMMAP	1	10.44	111.333	72	68	23.5295	23.0527	0	1	8.04	108	74	82.3333	23.2307	1	0	7.93	109	70.3333	75.6667	23.6085	98.7952	0	0	0	0	0	0	0	0	0	0	0
49	2018-03-26	UNIMMAP	1	13.23	100	57	68	17.3434	18.1273	0	1	8.5	97	60	72	18.1495	1	0	6.97	98.3333	59.6667	68.6667	17.7334	97.5904	0	0	0	0	0	0	0	0	0	0	0
50	2018-04-03	UNIMMAP	1	13.17	119.667	68.6667	78.3333	22.6069	43.7536	1	1	9.36	113.333	75.6667	89	22.7556	0	1	6.91	110.667	69.3333	106.667	22.8959	100	0	0	0	0	0	0	0	0	0	0	0
51	2018-04-02	UNIMMAP	1	47.45	125.667	68.3333	49.3333	19.6364	41.7495	0	1	13.78	109	70	55.6667	19.923	1	0	15.62	111.333	69	49.3333	19.5169	97.5904	0	0	0	0	0	0	0	0	0	0	0
52	2018-04-03	UNIMMAP	1	10.51	143.667	89	53	23.1887	33.2074	0	1	11.84	126.333	85.6667	63	23.5386	0	0	7.08	131.333	84	65	23.8451	100	0	0	0	0	0	0	0	0	0	0	0
53	2018-03-26	UNIMMAP	1	14.36	114.333	78	72.6667	27.4889	44.731	0	1	13.04	116.333	70.3333	72.3333	28.1933	1	0	11.21	105	68.3333	71.3333	27.9466	97.5904	0	0	0	0	0	0	0	0	0	0	0
54	2018-04-04	UNIMMAP	1	6.2	126.333	73.3333	69	26.1576	21.1855	0	1	5.85	126.333	74.3333	65.6667	26.1678	1	0	7.77	130.333	77.3333	64.3333	26.0205	98.7952	0	0	0	0	0	0	0	0	0	0	0
55	2018-04-02	UNIMMAP	1	7.15	119.333	70.3333	56.3333	19.0069	18.0479															81.9277	0	0	0	0	0	0	0	0	0	0	0
56	2018-04-02	UNIMMAP	1	11.28	122.333	79	77.6667	26.2352	28.9117	1	1	9.5	119.333	79.3333	82	26.7882	1	1	11.18	113	80	82.3333	26.5998	83.1325	0	0	0	0	0	0	0	0	0	0	0
57	2018-04-02	UNIMMAP	1	7.44	98	53.3333	67	22.5855	19.7509	0	1	5.61	97	51	70	22.9273	1	0	7.59	91.3333	53.3333	75	22.3977	90.3614	0	0	0	0	0	0	0	0	0	0	0
58	2018-04-04	UNIMMAP	1	8.73	111.667	62	69.3333	19.9392	20.2491	1	1	6.34	120	69.3333	72	20.1106	0	0	8.89	104.333	64	64.6667	20.1162	98.7952	0	0	0	0	0	0	0	0	0	0	0
59	2018-04-04	UNIMMAP	1	13.55	129	66.6667	95.3333	23.3552	21.8015	0	1	7.76	112.333	67.6667	98.3333	22.9001	1	0	10.03	128	71	102	22.8116	95.1807	2	3	2	0	0	3	0	0	0	0	0
60	2018-03-28	UNIMMAP	1	14.67	100.333	60.3333	60.3333	22.9008	41.7358	1	1	11.61	98	58.3333	62	23.5257	1	1	8.51	101.333	59.6667	60.3333	24.2659	100	0	0	0	0	0	0	0	0	0	0	0
61	2018-04-03	UNIMMAP	1	3.01	96.3333	64.3333	72.3333	16.965	18.7543	0	1	2.78	90.3333	59.3333	78.6667	17.2016	0	0	6.83	89.3333	58	83.3333	16.7815	100	0	0	0	0	0	0	0	0	0	0	0
62	2018-03-30	UNIMMAP	1	7.02	95.6667	70.6667	77	20.1935	43.7426	0	1	7.72	100	70.6667	82.3333	21.2426	1	0	7.34	107	70.3333	85.3333	20.5957	100	0	0	0	0	0	0	0	0	0	0	0
63	2018-04-02	UNIMMAP	1	6.52	134	71.3333	77	23.5217	20.8131															83.1325	0	0	0	0	0	0	0	0	0	0	0
64	2018-03-28	UNIMMAP	1	6.21	121.667	75.6667	71.6667	27.4883	23.8522	0	1	8.74	119	73	70.3333	27.9113	1	0	8.83	113.333	78.3333	73.3333	27.8627	73.494	0	0	10	0	0	0	0	0	0	0	0
65	2018-04-02	UNIMMAP	1	10.05	122.333	72.3333	74	20.9623	22.5462															89.1566	0	0	0	0	0	0	0	0	0	0	0
66	2018-03-28	UNIMMAP	1	13.32	108.667	72.3333	91	19.9562	19.4168	0	1	8.55	104	70.6667	80	21.3137	1	0	7.63	103.667	66.6667	82.6667	21.3314	100	0	0	0	0	0	0	0	0	0	0	0
67	2018-04-04	UNIMMAP	1	7.29	114	66	70.6667	23.3176	19.8138	0	1	7.8	120.333	62.3333	71	23.3137	1	0	9.03	116.667	68	67	23.4677	90.3614	0	0	0	0	0	0	0	0	0	0	0
68	2018-04-05	UNIMMAP	1	10.63	108	71.6667	82	19.0409	31.258	0	1	9.45	106.667	69	89	18.9225								100	0	0	0	0	0	0	0	0	0	0	0
69	2018-03-26	UNIMMAP	1	14.16	109	74	69.6667	27.0848	42.7324	0	1	12.09	106.333	70	77.3333	27.5648	1	0	10.04	99.6667	66.3333	66.6667	27.6689	98.7952	0	5	0	0	0	0	0	0	0	0	0
70	2018-03-26	UNIMMAP	1	12.91	125.333	94.6667	93.6667	23.1579	44.731	0	1	11.37	120.667	88	81	22.1615	1	0	10.97	122.333	90.6667	77.6667	21.2082	100	0	0	0	0	0	0	0	0	0	0	0
71	2018-03-28	UNIMMAP	1	6.72	105.333	52.6667	77.3333	16.8389	19.9343	0	1	7.03	98.6667	53	79	17.1016	1	0	4.63	102	63	87.3333	17.4056	100	0	0	0	0	0	0	0	0	0	0	0
72	2018-04-05	UNIMMAP	1	8.26	113	75.6667	77	27.7604	44.4736	0	1	8.8	111	72.3333	76	27.9965	1	0	9.29	113	74	75	27.5429	100	0	0	0	0	0	0	0	0	0	0	0
73	2018-04-03	UNIMMAP	1	9.14	113.667	70.6667	66	29.0816	37.7522	0	1	9.29	102	66.3333	70.3333	29.9497	1	0	7.4	114.667	77.3333	75.3333	30.8377	100	0	0	0	0	0	0	0	0	0	0	0
74	2018-04-04	UNIMMAP	1	10.29	122.333	70.3333	66.3333	17.3097	25.629	0	1	8.03	111.333	67.3333	78	17.6804	1	0	11.52	97.6667	67.3333	81.3333	16.3138	100	0	0	0	0	0	2	0	0	0	0	0
75	2018-03-30	UNIMMAP	1	5.45	95.6667	59	67.6667	19.0219	18.4257	0	1	6.35	96	63.6667	78	18.6908								100	0	0	0	0	0	0	0	0	0	0	0
76	2018-03-30	UNIMMAP	1	11.49	109.333	75	71.3333	20.6929	27.7426	0	1	10.63	106	65	70.3333	20.2217	1	0	9.25	98.3333	65.3333	76.6667	20.3468	89.1566	0	0	1	0	0	1	0	0	0	0	0
77	2018-04-02	UNIMMAP	1	14.82	135.333	86.6667	63	32.4716	44.9966	0	1	15.07	114.333	73	69.6667	32.684	1	0	14.99	122	65.6667	64.3333	32.2253	97.5904	0	0	0	0	0	1	0	0	0	0	0
78	2018-03-30	UNIMMAP	1	6.29	109	71	65.3333	29.6705	26.7433	0	1	7.47	135	71.3333	74.3333	29.6109	1	0	7.41	122	76.3333	76.6667	28.9683	100	0	1	0	0	0	0	0	0	0	0	0
79	2018-03-26	UNIMMAP	1	10.11	114	59	63.3333	18.4055	19.7618	0	1	9.89	116.667	65	61.3333	18.0402	1	0	7.58	118.333	69	60.3333	18.3545	95.1807	0	0	0	0	0	0	0	0	0	0	0
80	2018-03-28	UNIMMAP	1	9.11	128	63.6667	87.6667	23.0979	20.3778	0	1	7.95	113	64.3333	79.6667	23.3936	1	0	5.55	106	55.6667	85.3333	23.2087	100	0	0	0	0	0	0	0	0	0	0	0
81	2018-04-06	UNIMMAP	1	6.09	142.667	86.3333	62.3333	23.0394	24.7611	0	1	7.22	113.667	75.3333	62.3333	23.3459								67.4699	0	0	1	0	0	4	0	0	3	0	0
82	2018-04-06	UNIMMAP	1	10.06	120.667	74.6667	57.3333	21.012	38.7625															42.1687	0	0	0	0	0	0	0	0	0	0	0
83	2018-04-03	UNIMMAP	1	8.36	114	66.6667	75	17.514	19.6468	0	1	6.04	114.667	65.3333	73.6667	17.6985	0	0	8.22	108.333	69	97.3333	17.9023	100	0	0	0	0	0	0	0	0	0	0	0
84	2018-04-04	UNIMMAP	1	6.34	130.667	77.6667	77	18.6446	18.0561	0	1	6.8	113.667	78	70.6667	18.3821	1	0	7.52	112.667	71	81.3333	17.409	97.5904	0	0	0	0	0	3	0	0	0	0	0
85	2018-04-04	UNIMMAP	1	15.19	137.667	78	64.6667	21.4667	23.1321	0	1	11.54	103	59	72.3333	21.4916	0	0	10.97	101.333	59	72.6667	21.4207	100	0	0	0	0	0	0	0	0	0	0	0
86	2018-04-06	UNIMMAP	1	7.23	123.333	73.3333	101	18.3246	33.6564	0	1	7.39	109.667	70	77.6667	18.078	1	0	8.33	104.333	65	82.6667	17.5759	100	0	0	0	0	0	0	0	0	0	0	0
87	2018-03-29	UNIMMAP	1	8.77	109.667	70	76.6667	19.0956	22.2752	0	1	7.68	105.333	68.6667	74	18.7389	1	0	8.4	99.3333	65	72.3333	18.3915	100	0	0	0	0	0	0	0	0	0	0	0
88	2018-04-06	UNIMMAP	1	11.06	118.333	68	66.3333	21.9819	37.7604															42.1687	0	0	0	0	0	3	0	0	0	11	0
89	2018-03-29	UNIMMAP	1	7.43	115	74.3333	68.6667	26.7642	40.8761	0	1	9.41	118.667	74.3333	72.6667	26.7924	1	0	12.01	118	76.6667	67.6667	26.7147	100	0	0	0	0	0	0	0	0	0	0	0
90	2018-03-30	UNIMMAP	1	21.04	116	71	83.3333	28.1445	28.9528								1	0	13.07	108	72	85.3333	27.5155	100	0	0	0	0	0	0	0	0	0	0	0
91	2018-03-27	UNIMMAP	1	13.69	100	51.3333	64.6667	17.5914	19.2225															8.43373	0	0	1	0	0	0	0	0	0	0	0
92	2018-04-04	UNIMMAP	1	7.68	136.667	75.3333	62.6667	20.0603	38.757	0	1	7.26	119.333	75.3333	65.3333	20.6864	1	1	6.35	110	67.6667	68.3333	19.7981	91.5663	0	0	0	0	0	2	0	0	0	0	0
93	2018-04-02	UNIMMAP	1	13.36	115.667	77	70	25.0281	40.7502	0	1	11.66	116	77.6667	67.6667	24.6748	1	0	9.47	118	80.3333	75.3333	24.4833	86.747	0	0	0	0	0	0	0	0	0	0	0
94	2018-03-28	UNIMMAP	1	11.77	111	57	57.3333	21.7718	21.7358	0	1	9.33	119.667	59.6667	61	20.7069	1	0	8.59	114.333	68.3333	61.6667	19.4952	100	0	0	0	0	0	0	0	0	0	0	0
95	2018-04-03	UNIMMAP	1	5.09	116	63.6667	65.3333	30.0659	35.2142	0	1	4.19	112.667	64	66.3333	30.2625								100	0	0	0	1	0	0	0	0	0	0	0
96	2018-03-28	UNIMMAP	1	6.41	110	63.6667	85.3333	19.7311	25.8371	0	1	9.12	108	67.6667	82.3333	20.4566	1	0	5.48	101.667	66.6667	80	19.7454	98.7952	0	0	0	0	0	0	0	0	0	0	0
97	2018-03-29	UNIMMAP	1	12.84	114	82	74	25.7337	37.7385	0	1	17.89	106	72.6667	64.6667	26.3458	1	0	17.65	111	71.3333	65.3333	26.6726	98.7952	0	0	0	0	0	1	0	0	0	0	0
98	2018-03-27	UNIMMAP	1	26.14	121	77.6667	74.6667	22.1532	43.7344	0	1	10.21	114	65.6667	69.6667	22.1631	1	0	7.46	106	70	70	22.2072	91.5663	0	0	0	0	0	3	0	0	0	0	0
99	2018-03-26	UNIMMAP	1	13.8	126.667	69.3333	89.3333	21.4939	21.7687	0	1	8.7	110	59.6667	81	22.1059	1	0	7.85	111.667	60.3333	83.3333	22.0184	100	0	0	0	0	0	0	0	0	0	0	2
100	2018-04-03	UNIMMAP	1	10.11	141	78.3333	72.6667	27.1608	20.2382	0	1	7.26	135.667	83	95	26.8907	1	0	8.94	126.333	69	79	27.3845	100	0	0	0	2	0	6	0	0	0	0	0
101	2018-04-03	UNIMMAP	1	7.82	106	60	77	18.4629	22.13	0	1	5.4	92.3333	60.3333	78.6667	18.3987	1	0	6.9	91.3333	61.3333	103	17.8909	95.1807	0	0	0	0	0	0	0	0	0	0	0
102	2018-03-27	UNIMMAP	1	11.98	94.6667	53.3333	69	19.4396	28.2683	0	1	10.57	95.6667	60.6667	62.3333	19.7975								91.5663	0	1	0	0	0	0	0	0	0	0	0
103	2018-03-27	UNIMMAP	1	13.87	94	65.6667	85.6667	18.6686	28.2081	0	1	11.72	103.667	69.6667	72.3333	18.7006	1	0	8.41	94.3333	65	95	19.6066	91.5663	0	0	0	0	0	0	0	0	0	0	0
104	2018-03-29	UNIMMAP	1	11.6	96.3333	58.6667	69.3333	20.977	43.7399	0	1	14.36	86.6667	54	72	21.0565	1	0	14.98	91.6667	61.6667	73.3333	20.5037	100	1	2	0	0	0	5	0	0	0	0	0
105	2018-04-02	UNIMMAP	1	11.6	130.667	82.3333	69.3333	28.06	38.7515	0	1	10.89	123	79.3333	75.3333	28.3565								89.1566	0	0	0	0	0	0	0	0	0	0	0
106	2018-04-03	Drink powder	1	6.58	111.667	65	66.3333	21.7221	20.6543	0	1	7.56	109.667	64.3333	69.3333	22.2201	1	0	7.77	103	61	71.6667	21.1069	87.9518	0	0	0	0	0	0	0	0	0	0	0
107	2018-03-28	Drink powder	1	11.62	103	67.6667	69.3333	23.576	19.666															44.5783	0	0	0	0	0	1	0	0	0	0	1
108	2018-04-04	Drink powder	1	26.01	110.667	67	86.3333	27.9542	34.757	0	1	11.64	113.667	71.6667	75	28.6467	1	0	15.29	95.3333	61	81	32.2986	97.5904	0	0	0	0	0	0	0	0	0	0	0
109	2018-04-03	Drink powder	1	4.39	111.667	73.6667	70.3333	19.6254	18.4559	0	1	3.99	112.667	65.6667	80.6667	20.3307	1	0	5.57	101.333	67	84.6667	19.9403	100	0	0	0	0	0	0	0	0	0	0	0
110	2018-04-03	Drink powder	1	5.73	112	62.6667	99	28.4462	33.7522	0	1	6.96	97.3333	62.6667	70	28.5901	1	0	8.23	99.6667	65	78	29.345	100	0	0	0	0	0	0	0	0	0	0	0
111	2018-04-05	Drink powder	1	12.22	114	69.6667	71.3333	20.065	26.2423	0	1	8.78	114.333	77.3333	75	19.6111	1	1	9.25	103	69	79.6667	17.9252	97.5904	0	2	3	0	3	0	0	0	0	0	2
112	2018-04-02	Drink powder	1	15.23	141.667	89.6667	63	20.7467	43.7509	0	1	9.23	117	79.3333	70	20.2413	1	0	11.76	118	76	67.6667	20.6471	97.5904	1	1	0	0	0	0	0	0	0	0	0
113	2018-03-29	Drink powder	1	10.54	102.667	71.6667	60	29.7421	43.7399	0	1	10.24	121.667	75.3333	60.6667	29.8703	1	0	9.05	102	75	68	31.2478	100	2	2	2	0	0	1	0	0	0	0	0
114	2018-03-29	Drink powder	1	11.47	107.667	73	59.3333	23.297	39.7399	0	1	10.64	93	59.6667	61.3333	23.8133	1	0	14.36	102	70.3333	67.6667	23.5858	100	0	3	0	0	0	0	0	0	0	0	0
115	2018-04-04	Drink powder	1	9.71	122.667	84.3333	86.6667	36.6599	30.5626	0	1	8.78	136	81.6667	95.3333	37.1269	1	0	10.64	123	86.6667	95.3333	36.9193	100	0	0	0	0	0	0	0	0	0	0	0
116	2018-03-27	Drink powder	1	9.93	85.3333	53.3333	76	19.6665	20.3997	0	1	7.31	90.6667	58	79	19.3201	1	0	6.84	95.6667	60	76.3333	19.5507	90.3614	0	0	0	0	0	0	0	0	0	0	0
117	2018-03-30	Drink powder	1	6.12	107.333	65	79	20.0655	21.4264	0	1	6.12	106	68.3333	76	19.8331	1	0	5.78	108.333	64	81	19.4051	100	0	0	0	0	0	0	0	0	0	0	0
118	2018-03-26	Drink powder	1	6.41	134.333	83.6667	95.6667	16.8385	30.7324															22.8916	0	7	0	6	0	0	0	0	0	0	0
119	2018-04-02	Drink powder	1	12.61	122.333	72.6667	62	24.4617	39.7509	0	1	10.38	107	73	72.3333	23.7016	1	0	12.24	99.3333	63.3333	73.3333	23.9472	100	0	0	0	0	0	0	0	0	0	0	0
120	2018-04-06	Drink powder	1	11.06	102.333	69.6667	82.6667	13.7034	21.7604	0	1	4.15	93.6667	71	65	13.9388	1	0	7.71	89	69.6667	87.3333	13.9427	98.7952	0	0	1	1	0	14	0	0	0	1	0
121	2018-03-30	Drink powder	1	9.53	101.667	68	53.3333	24.8449	43.7426	0	1	10.03	92.3333	64.3333	60.3333	24.9089	1	0	10.9	94.3333	64.3333	66	25.0544	100	0	0	0	0	0	0	0	0	0	0	0
122	2018-03-28	Drink powder	1	7.09	115.333	73.6667	83	19.3552	23.7372	0	1	6.52	92.6667	62.6667	87	19.1629	1	0	6.32	92	64.3333	80	19.2286	100	0	0	0	0	0	0	0	0	0	0	0
123	2018-04-04	Drink powder	1	9.9	121	66.6667	100	25.1548	21.5003	0	1	9.61	119	67.3333	89.6667	25.0059	0	0	11.61	116.333	68.3333	85.6667	24.355	100	0	0	0	0	0	0	0	0	0	0	0
124	2018-03-27	Drink powder	1	7.49	105.667	70	82.3333	29.3109	29.1472	0	1	5.96	107.333	63.6667	78.6667	29.2244	1	0	5.86	97	65.3333	77.3333	30.0686	91.5663	0	0	0	0	0	0	0	0	0	0	0
125	2018-03-28	Drink powder	1	7.78	125.667	59	75	26.2695	18.7433	0	1	9	110.333	66	74	26.8655	1	0	7.66	108	70.3333	83.3333	27.118	100	0	0	0	0	0	0	0	0	0	0	0
126	2018-04-02	Drink powder	1	11.6	110	63.3333	73.3333	22.0736	18.6146	0	1	6.52	109	61.3333	55.3333	22.2062	1	0	7.71	115	64.3333	60	21.0108	91.5663	0	0	0	0	0	0	0	0	0	0	0
127	2018-03-26	Drink powder	1	15.58	122.333	74.3333	72.3333	31.663	28.6653	0	1	9.89	113	70.3333	78.6667	30.7101	1	0	6.47	108.333	71.3333	71.3333	30.8637	97.5904	0	0	0	0	0	0	0	0	0	0	0
128	2018-04-03	Drink powder	1	6.53	103	62	63.3333	20.9203	19.9261	0	1	5.05	106.333	63.3333	93	20.4748	1	0	8.03	101	55	80.3333	20.3905	100	0	0	0	0	0	0	0	0	0	0	0
129	2018-04-05	Drink powder	1	17.75	93.3333	51	69.6667	17.7918	21.7248	0	1	7.46	91	63.3333	72.6667	17.3024	1	0	8.16	91.6667	58.6667	68.6667	17.3458	100	0	0	0	0	0	0	0	0	0	0	0
130	2018-04-03	Drink powder	1	8.99	137	87	70	24.8302	42.7543	0	1	6.44	117.667	73.6667	81	24.8446	1	0	5.13	103.667	70.3333	79.3333	26.0097	91.5663	0	0	0	0	0	0	0	0	0	0	0
131	2018-03-26	Drink powder	1	10.39	120	64.6667	98.6667	18.6125	22.0424	0	1	10.12	126.667	62.3333	88	18.1354								95.1807	0	0	0	0	0	0	0	0	0	0	0
132	2018-04-04	Drink powder	1	17.02	133	84.3333	89.6667	30.1399	38.757	0	1	11.79	114.667	73.3333	81.3333	30.7495	0	0	11.75	117.333	80	89.3333	30.7124	90.3614	0	0	6	0	0	0	0	0	0	0	0
133	2018-03-28	Drink powder	1	10.19	113.667	66.3333	84.3333	21.0999	24.5366	0	1	5.8	121	67.3333	84.3333	22.3266	1	0	7.11	111.667	66	85.6667	21.9585	97.5904	0	0	0	0	0	0	0	0	0	0	0
134	2018-03-29	Drink powder	1	9.65	113.667	76.3333	80.3333	25.9623	42.7406	0	1	8.28	99.3333	67.3333	76.3333	25.6611	1	0	9.39	101.667	73.6667	68.3333	24.8201	100	0	0	2	0	0	2	0	0	0	0	0
135	2018-04-03	Drink powder	1	21.28	113.667	73.6667	64	20.6556	24.5558	0	1	8.34	103	67	90.3333	20.5751	1	1	10.62	105.667	70.3333	85	21.6998	100	0	0	4	8	7	6	0	0	0	0	7
136	2018-03-30	Drink powder	1	5.99	99.6667	64	71.3333	19.1495	20.3121	0	1	6.32	106.667	56.6667	67.3333	19.1178								100	0	0	0	0	0	0	0	0	0	0	0
137	2018-04-04	Drink powder	1	15.27	108	61.3333	80.6667	21.9335	26.8611	0	1	5.38	105	58.3333	79.6667	23.0165	1	1	7.03	104.667	63	107.667	20.8209	93.9759	0	0	0	0	0	1	0	0	0	0	0
138	2018-03-30	Drink powder	1	6.62	101.333	64	54	21.1236	39.7755	0	1	7.29	103	62.6667	61.3333	22.0909	1	0	6.96	103.333	67.6667	60	22.5019	100	0	0	0	0	0	0	0	0	0	0	0
139	2018-04-02	Drink powder	1	15.39	159.667	100	76	27.0235	39.3621	0	1	12.59	123	82	63.3333	27.2706	1	0	16.25	113.333	84	80	26.9401	97.5904	0	0	0	0	0	0	0	0	0	0	0
140	2018-03-27	Drink powder	1	9.45	121.667	76	70.3333	26.6979	28.7337	0	1	4.02	109.333	64	69.3333	26.8016								91.5663	0	0	0	0	0	0	0	0	0	0	0
141	2018-04-03	Drink powder	1	5.82	108.667	63	64.3333	25.9783	26.9788	0	1	5.61	122	71	66.6667	27.0892	1	0	6.87	102.667	62.6667	68	27.7513	92.7711	0	0	0	0	0	0	0	0	0	0	0
142	2018-03-27	Drink powder	1	17.84	144	109.667	106.333	16.2785	28.501	0	1	8.38	133	93.3333	127.333	16.1324	1	0	5.44	126.667	92.6667	116.333	16.1092	90.3614	0	0	0	0	0	0	0	0	0	0	0
143	2018-04-03	Drink powder	1	5.99	122	78.6667	51.3333	16.7778	23.0828	0	1	5.61	112	73	54.3333	17.0541	1	0	8.58	100.667	68	66.6667	16.8651	93.9759	0	0	0	0	0	0	0	0	0	0	0
144	2018-03-29	Drink powder	1	10.07	123	63.3333	60	20.4762	20.5914	0	1	7.77	104	61.3333	70.3333	20.275	1	0	8.91	107.667	61	84.6667	19.3357	100	0	0	3	0	0	0	0	0	0	0	2
145	2018-03-26	Drink powder	1	13.69	116.667	73.3333	63.3333	18.1116	40.8624	0	1	8.02	99.3333	55	60.3333	17.5626	1	0	6.27	92.3333	61.3333	59.3333	17.6508	100	0	1	0	4	0	0	0	0	0	0	0
146	2018-03-29	Drink powder	1	8.3	95.6667	56	71	22.1884	18.7844	0	1	7.79	97.3333	65	79.6667	22.1276								92.7711	0	0	2	0	0	1	0	0	0	0	3
147	2018-04-05	Drink powder	1	12.83	107.667	65.6667	75	19.0343	41.7577	0	1	8.44	100.667	66.6667	77.6667	18.8204	1	0	13.17	110	68.3333	70.3333	18.9998	100	0	0	0	6	0	0	0	0	0	0	0
148	2018-04-03	Drink powder	1	9.71	115.667	74.6667	60.3333	18.7411	20.7529	0	1	9.16	107	65.6667	69	18.6365	0	0	10.33	116.667	69.3333	72.6667	18.5952	100	0	0	0	0	0	0	0	0	0	0	0
149	2018-04-04	Drink powder	1	10.91	127.667	75.3333	69.3333	19.5699	39.7563	0	1	7.52	101	71	75	19.9585	0	0	8.5	96.6667	62.6667	73.6667	19.3721	98.7952	0	0	0	0	0	0	0	0	0	0	0
150	2018-04-03	Drink powder	1	10.4	126	70.3333	51.6667	28.954	28.7529	0	1	5.81	105.667	74	61.3333	29.531	1	0	7.61	105	63	64.3333	29.7408	100	0	0	0	0	0	0	0	0	0	0	0
151	2018-03-27	Drink powder	1	15.87	118	68.3333	80	19.9641	24.7337	0	1	9.24	106.333	62.3333	81.3333	20.1426	1	0	7.54	104.333	67	82	20.4195	89.1566	0	0	0	0	0	0	0	0	0	0	0
152	2018-04-02	Drink powder	1	12.61	112.333	68.6667	60.6667	29.5053	44.7502	0	1	10.62	104.333	68.6667	55.3333	29.578								95.1807	0	0	0	0	0	0	0	0	0	0	0
153	2018-04-03	Drink powder	1	7.43	130	84.6667	71.3333	24.2169	41.7522	0	1	6.93	111.333	73.3333	67.6667	24.8872	1	0	8.74	116.333	80	70.6667	24.4281	100	1	0	0	0	0	0	0	0	0	0	0
154	2018-03-26	Drink powder	1	11.21	114.667	79.3333	93.3333	17.8224	33.7303	0	1	8.15	119	76.3333	81.6667	18.7132	1	1	5.78	104.333	78.3333	83.3333	18.1427	100	0	3	0	6	0	0	0	0	0	0	0
155	2018-03-29	Drink powder	1	7.54	119	79.3333	65.6667	30.8099	39.7399	0	1	11.1	103.667	67.6667	58	30.1931	1	0	9.86	90	59	59.6667	30.6238	100	2	0	0	0	0	3	0	0	0	0	0
156	2018-03-28	Drink powder	1	6.49	110.333	57.6667	71.3333	16.1409	19.4004	0	1	4.74	114.333	63.6667	76.6667	16.9746	1	0	4.47	109	61.3333	73.6667	16.6646	100	0	0	0	0	0	0	0	0	0	0	0
157	2018-03-27	Drink powder	1	16.89	130	83.3333	75	30.7844	33.2457	0	1	14.38	124	80.3333	73.3333	31.4415	1	0	13.19	119.333	73.3333	73.6667	31.5884	91.5663	0	0	0	0	0	0	0	0	0	0	0
158	2018-03-27	Drink powder	1	23.54	107.333	75	54.6667	25.2289	42.7817	0	1	11.56	97	67.6667	57	25.366	1	0	10.7	98.3333	68.6667	55.6667	24.8724	91.5663	0	0	0	0	0	0	0	0	0	0	0
159	2018-03-28	Drink powder	1	11.1	105.333	68	71.3333	17.5276	33.7358	0	1	6.64	92	62.6667	80.6667	18.2329	1	0	6.65	97	59.3333	64	18.0014	97.5904	0	0	0	3	0	0	0	0	0	0	0
160	2018-03-26	Drink powder	1	19.56	98.3333	69	74	20.8826	33.7084	0	1	10.19	88	63.6667	89.3333	20.7489	1	0	11.53	96.3333	61	83.3333	21.0154	100	0	0	0	0	0	0	0	0	0	0	0
161	2018-03-30	Drink powder	1	4.9	93.3333	54	55.3333	20.8507	24.742	0	1	6.01	93.6667	55.6667	60	20.7125	1	0	4.57	95.6667	61.3333	65	21.579	100	0	0	0	0	0	0	0	0	0	0	0
162	2018-03-27	Drink powder	1	17	121.667	71.6667	79.3333	19.6523	32.7721	0	1	12.02	125	73	77.6667	19.4424	1	0	10.16	121	75.3333	78.3333	19.1683	90.3614	0	0	0	0	0	0	0	0	0	0	0
163	2018-04-06	Drink powder	1	8.16	103.667	66.6667	92	18.3314	18.3299	0	1	4.93	105.333	65.6667	80.6667	18.2022	1	0	5.58	106.667	71.3333	92.3333	19.2522	96.3855	0	0	0	0	0	0	0	0	0	0	0
164	2018-03-26	Drink powder	1	16.29	117	77	82.6667	19.3822	25.0185	0	1	11.28	112.667	80.6667	78	18.9625	1	0	8.37	109.667	73.3333	73.6667	18.0337	100	0	0	0	0	0	0	0	0	0	0	0
165	2018-03-26	Drink powder	1	16.32	106.667	68	71.3333	32.2633	43.7317	0	1	11.14	120.333	68.3333	79.3333	32.7001	1	1	7.34	103.333	66	72.6667	32.6064	100	0	0	0	0	0	0	0	0	0	0	0
166	2018-04-02	Drink powder	1	7.56	96	55.6667	65	20.1973	18.5435	0	1	7.37	103.667	64	82.3333	20.7169	1	0	7.72	106.333	63.3333	79.6667	20.2908	89.1566	0	0	0	0	0	0	0	0	0	0	0
167	2018-03-29	Drink powder	1	10.63	123	77.3333	61.3333	32.3704	39.4168	0	1	9.2	119.667	63.6667	69	32.045	1	0	10.86	123.333	74	68.3333	31.7822	100	0	0	1	0	0	0	0	0	0	0	0
168	2018-04-04	Drink powder	1	10.97	107.667	67	68	26.1114	25.7933	0	1	9.35	113	64.6667	81	25.8878								91.5663	0	0	0	0	0	2	0	0	0	0	0
169	2018-03-28	Drink powder	1	7.82	106.333	68.3333	71.6667	29.3271	41.7358	0	1	9.58	94.6667	58.3333	78	29.8136	1	0	7.52	96	63.3333	79.3333	30.6333	90.3614	0	0	0	0	0	0	0	0	0	0	0
170	2018-04-06	Drink powder	1	7.29	111.667	77.3333	96.3333	21.3844	33.7604	0	1	3.3	105.333	71.3333	82.6667	21.5606	1	0	6.17	97	64.6667	78.3333	21.2204	100	0	0	2	0	0	0	0	0	0	0	0
171	2018-03-28	Drink powder	1	32.78	109.667	66.3333	56.6667	17.0793	42.7379	0	1	15.89	104	60	45.3333	17.5704	1	0	12.12	94.6667	63.3333	54.3333	18.0396	100	0	0	0	0	0	0	0	0	0	0	0
172	2018-04-06	Drink powder	1	8.11	118.333	84.6667	79.3333	21.5373	37.7604	0	1	7.71	107.667	78	74.3333	21.7247								91.5663	0	0	0	0	0	1	0	0	0	0	0
173	2018-04-03	Drink powder	1	16.37	101.333	53.3333	50.6667	23.1985	18.8802	0	1	5.95	90.3333	58.3333	68.3333	22.5922	1	0	6.26	91.3333	55	69.3333	22.2268	95.1807	0	0	0	0	0	0	0	0	0	0	0
174	2018-03-26	Drink powder	1	16.32	129.667	62.6667	80.6667	28.1039	19.1513	0	1	10.62	129	67.3333	80.6667	28.6507	1	0	8.99	132	68	89.3333	28.4298	96.3855	0	0	0	0	0	0	0	0	0	0	0
175	2018-03-27	Drink powder	1	12.06	115.333	67.3333	81.6667	18.9696	39.7344	0	1	10.1	120.333	77.3333	95	18.4984	1	0	3.77	111.333	68	78.3333	18.1475	91.5663	0	0	0	0	0	0	0	0	0	0	0
176	2018-04-02	Drink powder	1	5.44	109.667	66.6667	73.3333	28.6098	28.7502															83.1325	0	0	0	0	0	0	0	0	0	0	0
177	2018-04-05	Drink powder	1	8.77	134.667	90.6667	104.333	23.8795	26.7598	0	1	5.55	114	77.6667	95.3333	23.3693	0	0	6.9	114	74	89.3333	23.7928	98.7952	0	0	0	0	0	0	0	0	0	0	0
178	2018-04-03	Drink powder	1	14.05	149.333	79.3333	50.6667	22.8989	43.7536	0	1	14.1	107.667	73	76.6667	22.4903	1	0	12.97	112.667	74	68.6667	23.9911	100	0	0	0	0	0	0	0	0	0	0	0
179	2018-04-06	Drink powder	1	6.27	121.667	76.3333	85.6667	17.0374	18.1246	0	1	4.91	110.333	77	94	17.2999								97.5904	0	0	0	0	0	0	0	0	0	0	0
180	2018-03-28	Drink powder	1	9.64	105.667	57	75.6667	20.8357	18.2971	0	1	10.61	104.333	58.3333	72.3333	20.5738	1	0	6.95	102.667	58	71.6667	21.1232	100	0	0	0	0	0	0	0	0	0	0	0
181	2018-03-27	Drink powder	1	9.9	131	99	77.3333	32.5498	33.7331	0	1	4.68	118.333	86.6667	81.3333	31.8889	1	0	6.58	115.333	83.3333	73.3333	31.3656	86.747	0	0	0	0	0	0	0	0	0	0	0
182	2018-04-05	Drink powder	1	6.97	111.667	63.6667	88	28.445	36.3149	0	1	4.9	103.667	70.3333	85.3333	28.6296	1	0	7.8	105.333	67.6667	81.3333	28.5124	98.7952	0	0	0	0	0	0	0	0	0	0	0
183	2018-03-27	Drink powder	1	7.66	109.667	62.6667	94.3333	17.9	18.9596	0	1	3.15	99.3333	56.3333	87	18.1071	1	0	3.82	94.6667	61	64	17.9612	85.5422	0	0	0	0	0	0	0	0	0	0	0
184	2018-03-29	Drink powder	1	11.78	109.667	75.3333	63.3333	23.4063	40.3203	0	1	13.48	95.3333	58.3333	59.6667	23.6009	1	0	17.81	104.333	70.3333	74	22.946	100	3	0	0	0	0	5	0	0	0	0	0
185	2018-04-04	Drink powder	1	16.89	121.333	69.6667	74	21.9351	20.0548	0	1	8.8	107.333	67	72.6667	22.0636	1	0	10.91	114.667	74	83	21.4651	93.9759	0	0	0	1	0	0	0	0	0	0	0
186	2018-03-29	Drink powder	1	8.57	107	71	67	27.2588	34.1547	0	1	9.14	108	75	68.6667	27.7149	1	0	8.73	101.667	70.3333	71	26.4568	100	0	0	1	0	0	0	0	0	0	0	0
187	2018-04-05	Drink powder	1	6.15	122.333	68.3333	70.6667	22.2544	22.3107															42.1687	0	0	0	0	0	0	0	0	0	0	0
188	2018-04-02	Drink powder	1	11.88	101	62.6667	61	15.5933	34.8063	0	1	9.42	96	62	65.3333	15.9465	0	0	15	89	55	63	15.5176	100	0	0	0	0	0	0	0	0	0	0	0
189	2018-04-03	Drink powder	1	7.92	109.333	64.6667	64.6667	17.3336	18.7379	0	1	5.7	105.667	67.3333	70	18.0226								98.7952	0	0	0	0	0	0	0	0	0	0	0
190	2018-04-05	Drink powder	1	24.48	95	67.6667	77.6667	14.659	35.7591	0	1	10.69	94.6667	61.6667	71	15.1236								100	0	0	0	0	0	0	0	0	0	0	0
191	2018-04-02	Drink powder	1	8.69	131.667	76.6667	53	31.6061	43.3785	0	1	7.77	119	76	59	31.1688	1	0	8.1	105.667	74.3333	62.3333	31.167	98.7952	0	0	0	0	0	0	0	0	0	0	0
192	2018-04-05	Drink powder	1	50	114	63.6667	58.6667	20.8189	43.7591	0	1	16.21	95	67	68.6667	19.9791	1	1	13.46	109.333	63.3333	58	20.4323	100	0	0	0	0	0	0	0	0	0	0	0
193	2018-03-28	Drink powder	1	14.14	163.667	98.3333	99	26.2713	42.7379	0	1	8.71	142.667	88.3333	102	26.5337	1	0	8.71	138	86	84.6667	26.4555	100	0	0	0	0	0	0	0	0	0	0	0
194	2018-03-30	Drink powder	1	11.74	127.667	75.6667	63.6667	22.4405	40.0493	0	1	10.82	117.333	69	69	22.5528								100	0	0	0	0	0	0	0	0	0	0	0
195	2018-03-26	Drink powder	1	18	121.333	88.6667	95	20.1855	38.7324	0	1	12.06	116.333	77	103	20.3058	1	0	9.01	120	82	86.6667	19.7268	97.5904	0	0	0	0	0	3	0	0	0	0	0
196	2018-04-04	Drink powder	1	11.43	122.667	76.6667	75.6667	23.375	38.757	0	1	7.28	108	69.3333	92.6667	24.478	1	1	5.14	102.667	70	80	23.7973	95.1807	1	1	0	0	0	3	0	0	0	0	0
197	2018-04-02	Drink powder	1	5.92	120	72	52	22.4042	34.9213															42.1687	0	0	0	0	0	0	0	0	0	0	0
198	2018-04-06	Drink powder	1	5.82	124	89.6667	79.6667	20.4703	43.7618	0	1	4.4	107.333	76	71.6667	20.5303	1	0	5.61	96.6667	68.6667	77	20.5461	98.7952	0	0	1	0	0	0	0	0	0	0	2
199	2018-03-26	Control	1	15.19	105.333	56	72.3333	25.4721	39.7317	0	1	12.04	116.667	77	84	25.3793	1	0	9.54	93.6667	56.3333	79	24.0255
200	2018-04-03	Control	1	14.97	137	68.6667	89	21.8891	19.1376	0	1	11.5	117	61.6667	85	21.9364	1	0	9.06	128.333	69.6667	104.333	22.9379
201	2018-03-30	Control	1	8.77	111.667	65.3333	56.3333	22.7147	33.7413	0	1	10.97	92.6667	53	70.6667	21.9173	1	0	10.06	96.3333	59.3333	66	22.2997
202	2018-03-27	Control	1	12.66	121	77.3333	80.6667	22.7818	41.3717	0	1	21.1	109.667	67.6667	72.3333	22.2122	1	0	14.91	105.667	69.3333	73	22.7554
203	2018-03-27	Control	1	7.23	127.333	59.3333	72	18.2369	18.2642	0	1	8.74	112.333	60.3333	72	17.8497	1	0	7.59	122.333	63.6667	76.6667	18.0167
204	2018-04-02	Control	1	9.89	115.333	78.6667	69	25.963	43.7509	0	1	11.2	103.333	73.3333	67	26.7338	1	0	12.32	92.3333	60.3333	79.3333	26.3179
205	2018-04-06	Control	1	4.84	111	71.3333	87.6667	18.1182	20.7912	0	1	5.67	105	70	84	18.3956	1	0	5.97	103.333	69.6667	82.6667	18.0812
206	2018-03-27	Control	1	6.95	126.667	77.6667	72.3333	18.2489	22.7351	0	1	6.96	98.6667	63.6667	85.6667	17.6446	1	0	5.85	119	81	86.3333	17.3986
207	2018-04-03	Control	1	11.72	142.667	93	81	21.5763	26.7543	0	1	11.94	127.667	80	101.333	21.8332	1	0	10.22	136.333	89.3333	93.3333	22.6471
208	2018-04-03	Control	1	19.44	97.6667	63	67	24.7962	34.7543	0	1	17.44	88.3333	58.3333	71.3333	25.0729	1	0	15.25	90.3333	62.3333	81.6667	24.7758
209	2018-03-29	Control	1	7.68	121.333	74	57.6667	21.4312	40.7392	0	1	9.55	96.6667	59.6667	64.3333	22.1948	1	0	8.89	102.333	67.3333	62.6667	22.3022
210	2018-04-05	Control	1	6.56	96	56.6667	55.6667	17.6927	28.219	1	1	6.76	90	59.3333	68	17.6104	1	1	6.36	93.3333	61.6667	78	17.6956
211	2018-03-30	Control	1	5.92	97	68	74	19.1957	27.8467	0	1	9.79	101	68.6667	72.6667	21.6911	1	0	8.83	97	69.3333	81	19.5313
212	2018-03-29	Control	1	7.32	117.333	74.6667	106	19.8961	29.7385	0	1	9.76	106.667	69.3333	102.333	19.1158	1	0	12.23	93.6667	69.6667	98.3333	17.8895
213	2018-04-03	Control	1	20.76	125.667	83	68.6667	27.2044	44.7529	0	1	24.89	121.333	79.3333	71	28.1048	1	0	20.33	128	82.6667	77	28.0917
214	2018-03-29	Control	1	10.95	109.667	71.6667	71	28.3615	24.2272	1	1	12.22	107	66	74	28.8418	1	1	11.18	117	59.3333	85.6667	28.0602
215	2018-04-06	Control	1	7.02	96.6667	62.6667	81	16.692	26.7625	0	1	10.15	96.6667	64.6667	80	16.9058
216	2018-03-27	Control	1	16.19	142.333	81	59.6667	19.6007	43.7344	0	1	17.67	107	69.3333	63.6667	19.187
217	2018-04-06	Control	1	6.02	87.3333	60	79.3333	16.5189	30.7625
218	2018-04-06	Control	1	7.87	103	59	77	15.7357	23.7618	0	1	7.82	97	57.3333	76.6667	15.8352	1	0	6.72	96.3333	57.6667	74	15.9842
219	2018-03-26	Control	1	12.19	155.667	97.3333	102	25.0513	27.8056	0	1	13.85	157	97.6667	122	24.7241	1	0	7.87	144.333	100.333	101.667	24.9201
220	2018-03-27	Control	1	13.54	139	62.6667	67	28.8263	31.7344	0	1	16.54	115.333	66.6667	69.6667	27.2356	1	0	14.48	126.667	72	77.6667	27.4742
221	2018-04-04	Control	1	9.67	132.333	75.3333	81.3333	22.5138	27.7563	0	1	9.3	123.333	75.3333	82	22.5051	1	0	8.68	116.667	74.3333	85.3333	22.7404
222	2018-04-04	Control	1	16.2	105	63.3333	67.6667	21.149	19.0938	0	1	15.12	89.6667	68.3333	72.3333	20.3476	1	0	15.68	98.6667	67	76	20.8744
223	2018-04-06	Control	1	5.02	102	65	57.3333	19.5405	22.7625	0	1	4.15	94	62.3333	55.3333	19.2616	1	0	6.44	97	65	58.6667	19.4697
224	2018-04-06	Control	1	10.1	105.667	75	96	26.6556	28.7611	0	1	12.93	111.333	71	85	27.1725	1	0	11.51	100.667	69.6667	90.3333	26.4785
225	2018-04-05	Control	1	12.01	108	62.6667	70.3333	28.3338	41.7577	0	1	16.61	101	66.6667	70.6667	27.8151
226	2018-03-28	Control	1	9.68	103.667	64.3333	88.3333	20.3909	19.7372	0	1	11.04	104.667	60	98	19.4779	1	0	7.4	92	55.3333	79.6667	19.3574
227	2018-03-28	Control	1	12.24	111	64.3333	77.6667	26.7229	41.7358	0	1	14.17	108	67.6667	68.3333	26.707	1	0	9.96	103.667	66.6667	70.6667	27.4862
228	2018-03-28	Control	1	5.6	89.6667	47.6667	64.3333	17.9892	40.7365	0	1	9.88	91.6667	55.6667	63	18.3641	1	0	7.59	92	58	66	19.0219
229	2018-03-30	Control	1	8.32	107.667	62	65.3333	19.882	19.9535	0	1	9.13	110.333	64.6667	73.3333	20.3611	1	0	8.37	112	65	75.6667	19.2687
230	2018-04-03	Control	1	6.98	113	74.6667	64.6667	19.4852	18.2943	0	1	5.09	102.333	69.3333	71.6667	18.9233	0	0	5.93	105	62	82	18.5946
231	2018-04-05	Control	1	13.61	111.667	76.6667	79.3333	16.7901	27.7591	0	1	13.67	104.333	79	76.6667	16.9621	1	0	13.76	113	79	80.6667	16.9533
232	2018-04-04	Control	1	10.91	117.667	65	71.3333	24.549	22.2149	0	1	10.06	113	66	66.3333	24.2067	1	0	10.6	113.333	66.3333	78.6667	25.1847
233	2018-04-04	Control	1	8.42	107.667	56.3333	68.3333	27.2949	32.7556	0	1	9.42	93.3333	59.3333	69.3333	23.3408	1	0	14.5	97	62	60.3333	22.4582
234	2018-04-06	Control	1	10.37	111.333	70.6667	73	18.8143	26.5982	0	1	11.93	95.6667	69	71.3333	18.6201	1	0	11	100.333	68.3333	81.6667	17.2215
235	2018-04-04	Control	1	8.82	114.667	72.3333	69.3333	17.683	31.1732	0	1	8.49	103	66	71	18.0484	1	0	9.69	104	70	81.6667	18.6395
236	2018-04-03	Control	1	8.17	117.333	67.3333	74	18.9656	19.5565	0	1	10.37	109	68.3333	86.6667	18.6059	1	0	10.1	103.333	63	90	18.1039
237	2018-03-28	Control	1	11.99	119.333	65	74	29.7575	37.6208	0	1	16.06	116	70.3333	73	28.9334	1	0	9.48	104	63.3333	78.6667	30.0084
238	2018-04-03	Control	1	11.58	107.667	75.6667	60.6667	20.5044	37.7522	0	1	13	90.3333	67.6667	79.3333	21.2956	1	1	14.04	87.3333	59.6667	83.3333	20.0484
239	2018-03-27	Control	1	15.76	119.667	67	94.6667	22.0008	18.6776	0	1	18.25	111	69.3333	94.3333	21.6636	1	0	10.78	111.333	68	90	21.7628
240	2018-03-29	Control	1	13.21	120	80	72.3333	21.6886	23.7399	0	1	10.04	112	66	52.6667	20.1471	1	0	8.18	108.667	72	62	20.206
241	2018-04-03	Control	1	8.12	120.333	77.6667	78.3333	25.6685	28.7529	0	1	10.84	104	75	79.3333	26.2006
242	2018-03-28	Control	1	13.62	115.333	72	61.3333	21.1844	32.5667	0	1	8.1	104.333	66.6667	68.3333	21.5611	1	0	6.72	106.667	63.3333	61.3333	21.732
243	2018-03-30	Control	1	8.13	91	62	64.3333	23.18	44.742	0	1	12.5	98.3333	58.6667	63	23.7507
244	2018-03-27	Control	1	12.01	101	58	61	16.3945	19.7344	0	1	9.83	98.3333	61	51	16.7254
245	2018-03-30	Control	1	8.67	104.333	72.3333	73.3333	25.5848	43.7426
246	2018-03-29	Control	1	16.61	101	68	73	35.6581	36.6078	0	1	14.8	90.6667	60.6667	70	35.106	1	0	15.14	103.667	62.6667	76	36.7093
247	2018-04-02	Control	1	11.32	154.667	85.6667	57.6667	33.4359	41.7495	0	1	13.26	128.333	88.3333	78.3333	33.3076
248	2018-04-03	Control	1	11.42	126	76.3333	68.3333	26.1053	43.7536	0	1	16.98	103.667	68.3333	68.3333	25.5488	1	0	14.37	105.667	69	72.6667	26.3973
249	2018-04-02	Control	1	9.1	137.333	82	85	28.9385	28.7502	0	1	10.14	120	74.6667	77	29.3944	1	0	9.83	126.333	80.3333	86	27.4797
250	2018-03-28	Control	1	12.44	118.333	65.6667	60.3333	20.6671	22.7981	0	1	13.01	114.333	61.6667	62.3333	20.6119	1	0	6.89	113	65	66	20.5459
251	2018-04-04	Control	1	11.55	147.667	92	70	16.3525	44.7556	0	1	12.03	106.667	70.6667	82.3333	15.6631	1	0	12.78	84.3333	61.6667	93.6667	15.3533
252	2018-04-03	Control	1	10.68	123.667	86.6667	72.6667	19.3876	39.7536	0	1	15.98	102.333	77	84.6667	20.1193	1	0	12.34	109	76	83.6667	20.6839
253	2018-03-29	Control	1	9.16	137.667	89.3333	91	29.6987	31.7399	0	1	10.15	116.333	71.6667	84.3333	30.1035	1	1	11.17	116	75.3333	95.3333	29.7746
254	2018-03-26	Control	1	24.37	111	73	79.6667	27.7373	30.371	0	1	30.1	112.667	75.6667	90.6667	27.408	1	0	15.05	115.667	70.6667	68.3333	27.3574
255	2018-03-28	Control	1	10.35	128.333	71.6667	77	18.5624	18.4531	0	1	10.71	115	61	72	18.705	1	0	7.59	112.333	64.3333	64.6667	18.9566
256	2018-03-27	Control	1	9.38	117	71.3333	72.6667	20.1099	20.2355	0	1	8.75	103.667	66.6667	79	19.5554	1	0	7.49	107.667	70.6667	86.3333	20.2843
257	2018-03-29	Control	1	6.22	126.667	80	53.3333	21.1604	35.4798	0	1	8.92	107.667	67.3333	58	21.0448	1	0	7.69	109.667	64.3333	55.6667	21.0267
258	2018-04-02	Control	1	8.46	113	76.6667	70.3333	20.5518	31.7509	0	1	10.6	115	78.6667	87.3333	20.5198	1	0	10.64	122	83.3333	89.3333	19.8564
259	2018-03-26	Control	1	21.44	102.333	55.3333	62.3333	20.8315	33.0815	0	1	26.93	99	70	76.3333	20.5776	1	0	25.8	94	57.6667	62	19.5782
260	2018-04-02	Control	1	7.63	99.6667	59.6667	65	17.4499	19.6632
261	2018-04-06	Control	1	4.35	105.333	63	75	17.6003	26.7625	0	1	5.14	100.333	69.6667	81.6667	17.7265
262	2018-03-27	Control	1	16.36	98.3333	63.3333	69.6667	27.3967	38.7351	0	1	18.4	95	62.6667	68.6667	27.3035	1	0	14.44	91.6667	67	65	26.9902
263	2018-03-29	Control	1	8.82	114	67.6667	57.3333	20.6345	36.7392	0	1	11.99	103.333	63	68.3333	22.0921	1	0	12.03	108.333	67.6667	67.3333	21.7635
264	2018-04-04	Control	1	7.96	123.333	91	76	17.3172	24.3997	0	1	16.03	118.333	82.3333	77.3333	17.9013	1	0	12.13	108.667	81.6667	81.3333	17.6598
265	2018-04-04	Control	1	10.24	111	59.3333	65	18.393	26.4613	0	1	8.78	103.667	68.3333	69.6667	19.3705	1	0	9.32	100.333	65.6667	80	18.4378
266	2018-04-04	Control	1	13.23	126	71.6667	73.6667	20.8588	24.4326	0	1	15.49	121.667	74.6667	70.3333	21.4922	1	0	14.19	123.333	77.6667	73	21.7258
267	2018-03-30	Control	1	9.77	112.667	72	63.6667	23.3263	43.7426	0	1	12.06	96.6667	70	74	23.6581	1	0	9.24	105.333	69.6667	61.3333	23.7266
268	2018-04-02	Control	1	10.81	102	63	89.3333	22.4418	20.3888	0	1	6.12	106	61.3333	88	23.3499	1	0	6.81	105	65.6667	85	23.7656
269	2018-03-26	Control	1	7.48	88.3333	64	63.3333	17.7646	41.7303	0	1	6.78	98.6667	68	65.6667	18.0295	1	0	8.11	87.3333	62.6667	67.6667	17.0653
270	2018-03-26	Control	1	10.54	95.3333	67.6667	72.6667	18.2091	41.7303	0	1	13.06	81.3333	62	87	18.1673	1	0	8.14	92.6667	59.3333	76.3333	18.0489
271	2018-04-05	Control	1	7.89	119.333	76.3333	60.6667	28.367	41.7577	0	1	7.22	115.333	75	65.6667	28.2671	1	0	8.91	119.667	79	75.6667	28.5136
272	2018-04-03	Control	1	9.48	127	79.3333	60.3333	17.0226	22.2259	0	1	5.97	96.3333	56.6667	69.6667	17.347	1	0	12.04	106.333	67.3333	80	17.3771
273	2018-04-03	Control	1	7.09	118.333	72	76.3333	21.2708	23.7536								1	0	10.01	105	62.3333	80.3333	20.7899
274	2018-04-05	Control	1	7.72	129	78.6667	69.6667	23.9056	39.7591	0	1	12.53	125	82.6667	67.6667	23.668
275	2018-03-26	Control	1	10.34	117.667	85.3333	81.6667	22.8186	21.6947	0	1	15.36	124.667	83.6667	83	22.0951	1	0	8.85	123.333	83.6667	79.6667	21.81
276	2018-04-06	Control	1	5.92	114.333	62.3333	58	16.7329	20.1314	0	1	8.73	108.333	68	60	16.0756	1	0	7.42	97.3333	64.3333	66	16.9413
277	2018-04-03	Control	1	4.6	106.333	65	76.6667	19.8739	20.5448	0	1	5.27	105	63.6667	91.3333	19.4264	1	0	6.49	95	58	95.3333	19.0288
278	2018-04-03	Control	1	8.34	109.667	71	85.3333	22.5809	40.7529	0	1	7.69	101.333	78.6667	79.3333	22.7537
279	2018-04-02	Control	1	9.52	120	69.3333	58.3333	28.8325	19.2307	0	1	10.83	115.333	70.6667	55.6667	29.4773	1	0	10.83	124.667	67.3333	73.3333	29.664
280	2018-03-29	Control	1	5.35	107.667	66.6667	71.3333	18.6944	18.1246	0	1	6.49	115	75.3333	77.3333	19.0846	1	0	9.19	109.667	72.6667	75.6667	18.6998
281	2018-04-03	Control	1	8.09	106.667	73.6667	68.6667	19.5971	22.4066	0	1	10.38	110	73	77.3333	19.7037
282	2018-03-27	Control	1	12.67	97.3333	66.3333	69.6667	21.2956	19.666	0	1	15.4	92	59.3333	85.6667	21.1164	1	0	9.43	108.333	72	63.3333	20.7894
283	2018-03-28	Control	1	11.71	129.333	88.3333	72.3333	31.2666	39.7372	0	1	16.96	123.667	83	73	31.5533	1	0	10.73	119	82.3333	76	32.0242
284	2018-03-27	Control	1	20.66	121.667	80.3333	94	26.8084	36.7337	0	1	21.91	117.667	72.3333	85	26.572	1	0	12.72	105	73.3333	74	26.7094
285	2018-04-02	Control	1	5.5	137.667	87	74.3333	22.7902	44.5339								1	0	9.41	118.667	80	77.3333	23.9921
286	2018-04-02	Control	1	7.94	104.667	59.3333	54	21.8709	29.8946
287	2018-03-29	Control	1	9.55	107.667	72.6667	87.3333	18.1965	20.3395	0	1	15.67	96.3333	64.3333	100.667	18.2161	1	0	11.08	98	66	102.333	18.106
288	2018-04-04	Control	1	13.89	120	62.3333	69.6667	23.0182	19.5565	0	1	12.52	125.667	71	80.6667	23.1721	1	0	14.01	114	72	61.6667	21.8825
289	2018-03-30	Control	1	11.63	153.333	80	95.6667	23.5199	21.9932	0	1	19.62	152	75	93	23.9879
290	2018-03-26	Control	1	37.97	123.667	70.3333	80	21.4756	29.7303	0	1	25.68	107.333	68.3333	80	21.3964
291	2018-03-26	Control	1	16.83	102	58.3333	69.3333	24.0621	38.7324	0	1	12.98	108	68	66.6667	24.9682	1	0	12.39	104.333	67.6667	63.6667	24.6821
292	2018-03-29	Control	1	15.31	114	71.6667	62.6667	25.7206	44.7392
293	2018-03-29	Control	1	9.58	121.333	74.6667	93.6667	18.0758	19.2361	0	1	12.14	115.667	67	89.6667	18.4751	1	0	16.42	115.667	68	90.3333	18.1892
294	2018-04-06	Control	1	8.88	99	60	82.3333	17.591	27.7618	0	1	11.73	102.667	67	78.6667	17.037	1	0	9.05	89.3333	62.6667	95.6667	16.0526
295	2018-03-26	Control	1	9.43	96.6667	64.3333	79	17.6723	26.976	0	1	8.95	100	63.3333	64	17.1565	1	0	8.46	111.667	65.6667	86.6667	16.5285
296	2018-03-28	Control	1	9.86	120.333	68.6667	74	28.6622	29.7385	0	1	9.29	105.667	70	69.3333	29.4221	1	0	12	108	75	77.3333	29.797
297	2018-04-02	Control	1	7.05	126.333	80.6667	91.6667	19.6855	19.6824	0	1	14.19	120	73.3333	87.3333	20.0646	1	0	9.77	122	78	86.6667	20.0787
298	2018-03-27	Control	1	13.15	112	62	79.3333	21.9306	23.3621	0	1	21.48	117.333	67	85.3333	21.7161	1	0	14.97	99.3333	60.3333	74.6667	21.3256
